# Supplementary material
Source: publisher figshare collection journal article supplement (https://tandf.figshare.com/ndownloader/files/5521574)
Supplement: Supplementary file 1 [file 5521574]

# Supplemental Web Material: Bayesian Hierarchical Multi-Population Multistate Jolly-Seber Models with Covariates: Application to the Pallid Sturgeon Population Assessment Program

Guohui Wu<sup>1</sup> and Scott H. Holan<sup>2</sup>

---

<sup>1</sup>SAS Institute Inc., Cary, NC 27513

<sup>2</sup>Department of Statistics, University of Missouri, 146 Middlebush Hall, Columbia, MO 65211-6100

## Appendix A: Full Conditional Distributions

We provide details about the full conditional distributions for the multi-population multistate Jolly-Seber (MP-MSJS) model with covariates using state-space modeling.

- $[N^k|\cdot], k = 1, 2, \dots, K$ .

$$[N^k|\cdot] \propto \binom{N^k}{n^k} \left[ 1 - \sum_{t=1}^T \sum_{s=1}^G \alpha_t(s) p_t^k(s) \right]^{N^k - n^k} \pi(N^k) 1(N^k \geq n^k),$$

where  $\alpha_1^k(s) = \beta_0^k(s)$  and for  $t = 1, 2, \dots, T-1$  the recursion follows that

$$\alpha_{t+1}^k(s) = \beta_t^k(s) + \sum_{r=1}^G \alpha_t^k(r) [1 - p_t^k(r)] q_t^k(r, s), \quad s \in \mathcal{G}.$$

Let  $\lambda^k = \sum_{t=1}^T \sum_{r=1}^G \alpha_t^k(r) p_t^k(r)$  refer to the probability for individuals of population  $\mathcal{P}^k$  in the study area to be marked, it then follows

$$N^k - n^k | \cdot \sim \begin{cases} \text{NegBin}(n^k, \lambda^k), & \text{if } \pi(N^k) \propto \frac{1}{N^k} \\ \text{NegBin}(n^k + 1, \lambda^k), & \text{if } \pi(N^k) \propto 1 \end{cases}$$

where  $\text{NegBin}(n, p)$  denotes the negative binomial distribution with probability mass function being

$$p_X(x) = \binom{n+x-1}{x} p^n (1-p)^x, \quad x = 0, 1, \dots, n > 0 \text{ and } 0 < p \leq 1$$

- $[\psi_t^k(r, \cdot)|\cdot], r \in \mathcal{G} \text{ and } k = 1, 2, \dots, K$ .

$$[\psi_t^k(r, \cdot)|\cdot] \propto \prod_{s=1}^G \psi_t^k(r, s)^{W_t^k(r, s)}.$$

where  $W_t^k(r, s) = \sum_{i=1}^{N^k} z_{i,t+1}^k(s) z_{i,t}^k(r)$  for  $s \in \mathcal{G}$ . Therefore,

$$\psi_t^k(r, \cdot) | \cdot \sim \text{Dirichlet}(e_t^k(r, 1) + W_t^k(r, 1), \dots, e_t^k(r, G) + W_t^k(r, G)).$$

- $[\beta^k|\cdot]$ ,  $r \in \mathcal{G}$ ,  $t = 0, \dots, T-1$  and  $k = 1, 2, \dots, K$ .

$$[\beta^k|\cdot] \propto \prod_{t=0}^{T-1} \prod_{r=1}^G \left\{ \beta_t^k(r)^{E_t^k(r)} \right\} [\beta],$$

i.e.,

$$\beta^k \sim \text{Dirichlet}(\gamma_t^k(r) + E_t^k(r); r \in \mathcal{G}, t = 0, \dots, T-1).$$

where  $E_t^k(r, s) = \sum_{i=1}^{N^k} 1(z_{i,t+1}^k = r) 1(z_{i,t}^k = \star)$

- $[\theta_p|\cdot]$ ,  $p = 1, 2, \dots, P$ .

$$\theta_p|\cdot \sim N(\mu_{\theta_p|\cdot}, \sigma_{\theta_p|\cdot}^2),$$

where

$$\begin{aligned} \sigma_{\theta_p|\cdot}^2 &= \left\{ \sum_{k=1}^K \frac{\sum_{t=1}^T \sum_{r=1}^G x_{tr,p}^2}{\sigma_k^2} + \frac{1}{\sigma_{\theta_p}^2} \right\}^{-1}, \\ \mu_{\theta_p|\cdot} &= \sigma_{\theta_p|\cdot}^2 \left\{ \sum_{k=1}^K \frac{\sum_{t=1}^T \sum_{r=1}^G x_{tr,p} (\tilde{p}_t^k(r) - \sum_{s \neq p} x_{tr,s} \theta_s)}{\sigma_k^2} + \frac{\mu_{\theta_p}}{\sigma_{\theta_p}^2} \right\}. \end{aligned}$$

- $\sigma_k^2|\cdot \sim \text{IG}(C_k^*, D_k^*)$ ,  $k = 1, 2, \dots, K$  and

$$\begin{aligned} C_k^* &= \frac{TG}{2} + C_k, \\ D_k^* &= \frac{\sum_{t=1}^T \sum_{r=1}^G (\tilde{p}_t^k(r) - \mathbf{X}_{tr}' \boldsymbol{\theta})^2}{2} + D_k. \end{aligned}$$

- $\gamma_m|\cdot \sim N(\mu_{\gamma_m|\cdot}, \sigma_{\gamma_m|\cdot}^2)$ ,  $m = 1, 2, \dots, M$ , where

$$\begin{aligned} \sigma_{\gamma_m|\cdot}^2 &= \left\{ \sum_{k=1}^K \frac{\sum_{t=1}^{T-1} \sum_{r=1}^G \Omega_{tr,m}^2}{\xi_k^2} + \frac{1}{\sigma_{\gamma_m}^2} \right\}^{-1}, \\ \mu_{\gamma_m|\cdot} &= \sigma_{\gamma_m|\cdot}^2 \left\{ \sum_{k=1}^K \frac{\sum_{t=1}^{T-1} \sum_{r=1}^G \Omega_{tr,m} (\tilde{\phi}_t^k(r) - \sum_{s \neq k} \Omega_{tr,s} \gamma_s)}{\xi_k^2} + \frac{\mu_{\gamma_m}}{\sigma_{\gamma_m}^2} \right\}. \end{aligned}$$

- $\xi_k^2|\cdot \sim \text{IG}(A_k^*, B_k^*)$ ,  $k = 1, 2, \dots, K$  and

$$\begin{aligned} A_k^* &= \frac{(T-1)G}{2} + A_k, \\ B_k^* &= \frac{\sum_{t=1}^{T-1} \sum_{r=1}^G (\tilde{\phi}_t^k(r) - \boldsymbol{\Omega}_{tr}' \boldsymbol{\gamma})^2}{2} + B_k. \end{aligned}$$

- $[\tilde{p}_t^k(r)|\cdot], t = 1, 2, \dots, T, k = 1, 2, \dots, K$  and  $r \in \mathcal{G}$

$$[\tilde{p}_t^k(r)|\cdot] \propto \{\exp(\tilde{p}_t^k(r))\}^{U_t^k(r)} \{1 + \exp(\tilde{p}_t^k(r))\}^{-N_t^k(r)} \exp\left\{-\frac{(\tilde{p}_t^k(r) - \mathbf{X}'_{tr}\boldsymbol{\theta})^2}{2\sigma_k^2}\right\}.$$

- $[\tilde{\phi}_t^k(r)|\cdot], t = 1, 2, \dots, T - 1, k = 1, 2, \dots, K$  and  $r \in \mathcal{G}$

$$[\tilde{\phi}_t^k(r)|\cdot] \propto \{\exp(\tilde{\phi}_t^k(r))\}^{W_t^k(r)} \{1 + \exp(\tilde{\phi}_t^k(r))\}^{-N_t^k(r)} \exp\left\{-\frac{(\tilde{\phi}_t^k(r) - \boldsymbol{\Omega}'_{tr}\boldsymbol{\gamma})^2}{2\xi_k^2}\right\}.$$

## Appendix B: Proof of Lemma 3.1

We can easily show that the full conditionals of  $\tilde{p}_t^k(r)$  and  $\tilde{\phi}_t^k(r)$  take the following forms

$$[\tilde{p}_t^k(r)|\cdot] \propto \{\exp(\tilde{p}_t^k(r))\}^{U_t^k(r)} \{1 + \exp(\tilde{p}_t^k(r))\}^{-N_t^k(r)} \exp\left\{-\frac{(\tilde{p}_t^k(r) - \mathbf{X}'_{tr}\boldsymbol{\theta})^2}{2\sigma_k^2}\right\}, \quad (\text{B.1})$$

$$[\tilde{\phi}_t^k(r)|\cdot] \propto \{\exp(\tilde{\phi}_t^k(r))\}^{W_t^k(r)} \{1 + \exp(\tilde{\phi}_t^k(r))\}^{-N_t^k(r)} \exp\left\{-\frac{(\tilde{\phi}_t^k(r) - \boldsymbol{\Omega}'_{tr}\boldsymbol{\gamma})^2}{2\xi_k^2}\right\}. \quad (\text{B.2})$$

where

$$\begin{aligned} U_t^k(r) &= \sum_{i=1}^{n^k} y_{i,t}^k(r), \quad t = 1, 2, \dots, T, \\ W_t^k(r) &= \sum_{i=1}^{N^k} \sum_{s=1}^G 1(z_{i,t+1}^k = s) 1(z_{i,t}^k = r), \quad t = 1, 2, \dots, T - 1, \\ N_t^k(r) &= \sum_{i=1}^{N^k} 1(z_{i,t}^k = r), \quad t = 1, 2, \dots, T, \end{aligned}$$

for  $k = 1, 2, \dots, K$  and  $r \in \mathcal{G}$ . In other words,  $U_t^k(r)$  is the total number of individuals from population  $\mathcal{P}^k$  that are captured at location  $r$  at time  $t$ ;  $W_t^k(r)$  is the total number of individuals from population  $\mathcal{P}^k$  present at region  $r$  at time  $t$  that survive to time  $t + 1$ ; and  $N_t^k(r)$  is the total number of individuals from population  $\mathcal{P}^k$  that are alive and present at region  $r$  at time  $t$ . Moreover,  $n^k$  is the total number of individuals caught from population  $\mathcal{P}^k$ .

Taking the logarithm of (B.1) and (B.2) yields

$$\begin{aligned}\log[\tilde{p}_t^k(r)|\cdot] &= \text{const} + U_t^k(r)\tilde{p}_t^k(r) - N_t^k(r)\log\{1 + \exp(\tilde{p}_t^k(r))\} - \frac{(\tilde{p}_t^k(r) - \mathbf{X}'_{tr}\boldsymbol{\theta})^2}{2\sigma_k^2}, \\ \log[\tilde{\phi}_t^k(r)|\cdot] &= \text{const} + W_t^k(r)\tilde{\phi}_t^k(r) - N_t^k(r)\log\{1 + \exp(\tilde{\phi}_t^k(r))\} - \frac{(\tilde{\phi}_t^k(r) - \boldsymbol{\Omega}'_{tr}\boldsymbol{\gamma})^2}{2\xi_k^2},\end{aligned}$$

where **const** denotes any constant.

The derivation of the first and the second derivatives of  $\log[\tilde{p}_t^k(r)|\cdot]$  with respect to  $\tilde{p}_t^k(r)$  yields

$$\begin{aligned}\frac{\partial \log[\tilde{p}_t^k(r)|\cdot]}{\partial \tilde{p}_t^k(r)} &= U_t^k(r) - N_t^k(r) \frac{\exp\{\tilde{p}_t^k(r)\}}{1 + \exp\{\tilde{p}_t^k(r)\}} - \frac{\tilde{p}_t^k(r) - \mathbf{X}'_{tr}\boldsymbol{\theta}}{\sigma_k^2}, \\ \frac{\partial^2 \log[\tilde{p}_t^k(r)|\cdot]}{\partial \{\tilde{p}_t^k(r)\}^2} &= -N_t^k(r) \frac{\exp\{\tilde{p}_t^k(r)\}}{\{1 + \exp\{\tilde{p}_t^k(r)\}\}^2} - \frac{1}{\sigma_k^2} < 0.\end{aligned}$$

Similarly for  $\tilde{\phi}_t^k(r)$ , we have

$$\begin{aligned}\frac{\partial \log[\tilde{\phi}_t^k(r)|\cdot]}{\partial \tilde{\phi}_t^k(r)} &= W_t^k(r) - N_t^k(r) \frac{\exp\{\tilde{\phi}_t^k(r)\}}{1 + \exp\{\tilde{\phi}_t^k(r)\}} - \frac{\tilde{\phi}_t^k(r) - \boldsymbol{\Omega}'_{tr}\boldsymbol{\gamma}}{\xi_k^2}, \\ \frac{\partial^2 \log[\tilde{\phi}_t^k(r)|\cdot]}{\partial \{\tilde{\phi}_t^k(r)\}^2} &= -N_t^k(r) \frac{\exp\{\tilde{\phi}_t^k(r)\}}{\{1 + \exp\{\tilde{\phi}_t^k(r)\}\}^2} - \frac{1}{\xi_k^2} < 0.\end{aligned}$$

As a result, the full conditionals of  $\tilde{p}_t^k(r)$  and  $\tilde{\phi}_t^k(r)$  are log-concave.

## Appendix C: Sampling $\mathbf{z}$

To update the latent variables  $\mathbf{z}_i$ , we adapt the sampling algorithm developed by Dupuis and Schwarz (2007). For completeness, herein, we describe the algorithm in detail. Without loss of generality, we consider the single species case with  $\mathcal{G} = \{1, 2, 3\}$  and  $T = 10$ , since the algorithm for the latent variables remains the same within each population. Let  $N$  denote the population size. For  $i = 1, 2, \dots, N$ , we define two sets as follows:

$$S_1 = \{i : \mathbf{y}_i \neq \mathbf{0}\},$$

$$S_2 = \{i : \mathbf{y}_i = \mathbf{0}\},$$

where  $\mathbf{y}_i = (y_{i,1}, \dots, y_{i,T})$  denotes the capture history for an individual  $i$ . In other words, the set  $S_1$  contains individuals that are captured at least once during  $T$  sampling occasions; whereas the set  $S_2$  includes individuals that are never captured during the study. The update of latent variables  $\mathbf{z}_i$  will depend on the set that an individual  $i$  falls into. For example, consider a capture history of the form

$$\mathbf{y}_i = 0010030020, \quad (\text{C.1})$$

which indicates that an individual  $i$  is captured in location 1 at  $t = 3$ , in location 3 at  $t = 6$ , and last captured in location 2 at  $t = 9$ . It follows from (C.1) that the corresponding  $\mathbf{z}_i$  takes the form of  $\mathbf{z}_i = \cdot \cdot 1 \cdot \cdot 3 \cdot \cdot 2 \cdot$ , where  $\cdot$  denotes a missing location that needs to be simulated.

Before we move on to the sampling algorithm, we need to introduce some notation. First, we define  $f_i$  and  $l_i$  as the first and last times that an individual  $i \in S_1$  is captured. Moreover, define  $e_i$  as the time that individual  $i$  first enters the study area, which is unknown. Furthermore, three types of blocks due to Dupuis and Schwarz (2007) need to be in place. First, the Type I block  $B_1(i)$  consists of state variables corresponding to sampling times up to  $f_i$ . Second, the Type II block  $B_2(i)$  includes state variables corresponding to two successive capture events. Third, the Type III block  $B_3(i)$  is comprised of state variables corresponding to sampling occasions right after  $l_i$  to time  $T$ . Hence, for the capture history given in (C.1), it follows

$$\begin{aligned} B_1(i) &= \{z_{i,1}, z_{i,2}, z_{i,3}\}, \\ B_2(i) &= \{(z_{i,e_i}, z_{i,3}), (z_{i,3}, z_{i,6}), (z_{i,6}, z_{i,9})\}, \\ B_3(i) &= \{z_{i,10}\}, \end{aligned}$$

where  $e_i$  denotes the time that individual  $i$  first enters the study area and it is unknown.

For convenience of exposition, define  $m_{t_1,s}^{t_2,r}$  as the probability that an individual moves from location  $s$  at time  $t_1$  to location  $r$  at time  $t_2$ , where  $t_2 > t_1$ . The following recursive

relationship

$$m_{t,s}^{t+1,r} = \phi_t(s)\psi_t(s,r), \text{ for } t_1 \leq t < t_2,$$

$$m_{t,s}^{t+2,r} = \sum_{s'=1}^G m_{t,s}^{t+1,s'} m_{t+1,s'}^{t+2,r}, \text{ for } t_1 \leq t < t_2 - 1,$$

is needed to derive  $m_{t_1,s}^{t_2,r}$  for  $s, r \in \mathcal{G}$  and  $1 \leq t_1 < t_2 \leq T$ .

We now elaborate on the updating scheme of  $\mathbf{z}_i$  for  $i \in S_1$ . For  $t = 1, 2, \dots, T - 1$  and  $r \in \mathcal{G}$ , define  $\lambda_t(r)$  as

$$\lambda_{t+1}(r) = \beta_t(r) + \sum_{s=1}^G \lambda_t(s) \{1 - p_t(s)\} \phi_t(s) \psi_t(s, r),$$

and  $\lambda_1(r) = \beta_0(r)$ . For Type I block simulation, we need to determine  $e_i$  and  $z_{i,e_i}$ , which can be achieved by first simulating  $\mathbf{u}_i \sim \text{Multinomial}(1, \boldsymbol{\xi}_i)$  where

$$\mathbf{u}_i = (u_{i,1}(1), \dots, u_{i,1}(G), u_{i,2}(1), \dots, u_{i,2}(G), \dots, u_{i,f_i}(1), \dots, u_{i,f_i}(G)),$$

$$\boldsymbol{\xi}_i = (\xi_{i,1}(1), \dots, \xi_{i,1}(G), \xi_{i,2}(1), \dots, \xi_{i,2}(G), \dots, \xi_{i,f_i}(1), \dots, \xi_{i,f_i}(G)),$$

$$\xi_{i,t}(s) = \frac{\beta_{t-1}(s) \{1 - p_t(s)\} m_{t,s}^{f_i,r}}{\lambda_{f_i}(r)}, \text{ } r, s \in \mathcal{G} \text{ and } t = 1, 2, \dots, f_i.$$

As a result, we can determine  $e_i$  and  $z_{i,e_i}$  according to

$$e_i = \mathcal{T}(\mathbf{u}_i),$$

$$z_{i,e_i} = \mathcal{S}(\mathbf{u}_i).$$

where

$$\mathcal{T}(\mathbf{u}_i) = 1 + \left\lfloor \frac{\text{Ind}(\mathbf{u}_i) - 1}{G} \right\rfloor,$$

$$\mathcal{S}(\mathbf{u}_i) = \begin{cases} G, & \text{if } (\text{Ind}(\mathbf{u}_i) \bmod G) = 0, \\ \text{Ind}(\mathbf{u}_i) \bmod G, & \text{otherwise,} \end{cases}$$

where for a standard unit vector  $\mathbf{x}$  in  $\mathbf{R}^d$ ,  $\text{Ind}(\mathbf{x}) = j$  if  $x_j = 1$  for  $1 \leq j \leq d$ . Moreover,  $\lfloor u \rfloor$  denotes the largest integer not greater than  $u$ . After  $e_i$  is determined, we then set  $z_{i,t} = \star$  for  $1 \leq t < e_i$ .

For  $(z_{i,t_1}, z_{i,t_2}) \in B_2(i)$ , we need to simulate latent states between two consecutive ‘‘capture occasions’’  $t_1$  and  $t_2$ . For the trivial case where  $t_1 = t_2 - 1$ , there is no need to update the latent state variable. As a result, we assume  $z_{i,t_1} = s$  and  $z_{i,t_2} = r$  for  $1 \leq t_1 < t_2 \leq T$  and  $r, s \in \mathcal{G}$ . Our goal is to simulate missing state variables  $z_{i,t}$  for  $t_1 < t < t_2$ . To this end, we define

$$\begin{aligned} \alpha_{j,s}^{j',r}(s') &= P(z_{i,j+1} = s' | z_{i,j} = s, z_{i,j+1} = \cdot, \dots, z_{i,j'-1} = \cdot, z_{i,j'} = r) \\ &= \frac{\phi_j(s) \psi_j(s, s') \{1 - p_{j+1}(s')\} m_{j+1,s'}^{j',r}}{m_{j,s}^{j',r}}, \end{aligned}$$

for  $j < j'$ . Subsequently, we simulate  $\mathbf{v}_i \sim \text{Multinomial}(1, \boldsymbol{\alpha})$  with  $\boldsymbol{\alpha} = (\alpha_{j,1}^{t_2,r}, \alpha_{j,2}^{t_2,r}, \dots, \alpha_{j,G}^{t_2,r})$ . Then, we set  $z_{i,j+1} = \text{Ind}(\mathbf{v}_i)$  for  $t_1 \leq j < t_2 - 1$ .

Next, we discuss the simulation for the latent variables in the Type III block. For  $1 \leq t < T$  and  $s \in \mathcal{G}$ , let  $w_t(s)$  denote the probability that an individual leaves the study area after time  $t$  at location  $s$ . We can obtain  $w_t(s)$  using the recursion

$$w_t(s) = 1 - \phi_t(s) + \phi_t(s) \sum_{s'=1}^G \psi_t(s, s') \{1 - p_{t+1}(s')\} w_{t+1}(s'), \quad t = T-1, T-2, \dots, 1,$$

and  $w_T(s) = 1$ . To update  $z_{i,t} \in B_3(i)$  for  $t = l_i + 1, \dots, T$ , we first simulate  $o_{i,t}$  from

$$o_{i,t}(s) \sim \text{Bernoulli} \left( \frac{1 - \phi_{t-1}(s)}{w_{t-1}(s)} \right),$$

and then determine  $z_{i,t}$  according to

$$z_{i,t} = \begin{cases} \dagger, & \text{if } z_{i,t-1} = \dagger \text{ or } o_{i,t}(s) = 1, \\ \text{Ind}(\boldsymbol{\tau}_{i,t}), & \text{otherwise,} \end{cases} \quad (\text{C.2})$$

where  $\boldsymbol{\tau}_{i,t} \sim \text{Multinomial}(1, \boldsymbol{\varsigma}_t)$  with  $\boldsymbol{\varsigma}_t = (\varsigma_t(1), \dots, \varsigma_t(G))$  and

$$\varsigma_t(r) = \frac{\phi_t(s) \psi_t(s, r) \{1 - p_{t+1}(r)\} w_{t+1}(r)}{w_t(s)}, \quad \text{for } r \in \mathcal{G},$$



assuming  $z_{i,t-1} = s \in \mathcal{G}$ .

Lastly, we address the simulation of the latent variables  $\mathbf{z}_i \in S_2$ , i.e., for an individual that is never captured during the entire study. This requires us to first determine the time that an individual first enters the population (i.e., Type I block simulation) followed by ascertaining the status at subsequent sampling occasions after its entrance (i.e., Type III block simulation). To this end, we define  $\rho$  as the probability that an individual is never captured. Then, we can derive the following

$$\rho = 1 - \sum_{t=1}^T \sum_{r=1}^G \lambda_t(r) p_t(r).$$

To determine  $e_i$  for an individual  $i$ , we simulate  $\boldsymbol{\zeta}_i \sim \text{Multinomial}(1, \boldsymbol{\varpi})$  where

$$\begin{aligned} \boldsymbol{\zeta} &= (\zeta_1(1), \dots, \zeta_1(G), \zeta_2(1), \dots, \zeta_2(G), \dots, \zeta_T(1), \dots, \zeta_T(G)), \\ \boldsymbol{\varpi} &= (\varpi_1(1), \dots, \varpi_1(G), \varpi_2(1), \dots, \varpi_2(G), \dots, \varpi_T(1), \dots, \varpi_T(G)), \\ \varpi_t(s) &= \frac{\beta_{t-1}(s) \{1 - p_t(s)\} w_t(s)}{\rho}, \quad s \in \mathcal{G} \text{ and } t = 1, 2, \dots, T. \end{aligned}$$

Then we can determine  $e_i$  and  $z_{i,e_i}$  according to

$$\begin{aligned} e_i &= \mathcal{T}(\boldsymbol{\zeta}), \\ z_{i,e_i} &= \mathcal{S}(\boldsymbol{\zeta}). \end{aligned}$$

After  $e_i$  and  $z_{i,e_i}$  are determined, we need to perform the Type III block simulation for  $S_2$ . The details are omitted here due to its similarity with the Type III block simulation for  $S_1$  in the previous discussion.

## Appendix D: Likelihood function for complete data

The likelihood function for complete data  $L(\mathbf{Y}, \mathbf{z}|\boldsymbol{\Theta})$  has the following form

$$\begin{aligned}
 L(\mathbf{Y}, \mathbf{z}|\boldsymbol{\Theta}) &= \prod_{k=1}^K L_{\phi, \psi}^k \times L_{\beta}^k \times L_p^k \\
 &= \prod_{k=1}^K \left\{ \prod_{t=0}^{T-1} \prod_{r \in \mathcal{G}} (\beta_t^k(r))^{E_t^k(r)} \right\} \\
 &\quad \times \left\{ \prod_{t=1}^{T-1} \prod_{r \in \mathcal{G}} (\phi_t^k(r))^{W_t^k(r)} (1 - \phi_t^k(r))^{N_t^k(r) - W_t^k(r)} \prod_{s \in \mathcal{G}} (\psi_t^k(r, s))^{W_t^k(r, s)} \right\} \\
 &\quad \times \prod_{t=1}^T \prod_{r \in \mathcal{G}} (p_t^k(r))^{U_t^k(r)} (1 - p_t^k(r))^{N_t^k(r) - U_t^k(r)}.
 \end{aligned}$$

The log-likelihood function for complete data  $\ell(\mathbf{Y}, \mathbf{z}|\boldsymbol{\Theta}) = \ln L(\mathbf{Y}, \mathbf{z}|\boldsymbol{\Theta})$ .

## References

Dupuis, J. A. and Schwarz, C. J. (2007). “A Bayesian approach to the multistate Jolly–Seber capture–recapture model.” *Biometrics*, 63, 4, 1015–1022.
